# Supplementary material for: Enhancing reverse intersystem crossing and horizontal dipole orientation for near-infrared thermally activated delayed fluorescence molecules by donor engineering strategy
Source: Royal Society of Chemistry journal article supplement (doi:10.1039/d4tc00336e), 2024-01-01
Supplement: d4tc00336e1.pdf [file d4tc00336e1.pdf]

### *Supplementary Information*

The crystal prediction of Polymerph Predictor mainly includes three processes:

- (1) Monte Carlo simulated annealing, which includes two stages: heating and cooling.
- (2) Cluster analysis: Monte Carlo simulation will obtain a large number of un-optimized structures, including results from local energy minimization and similar structures. Cluster analysis employs a method similar to energy optimization to find representatives from similar structures and remove other redundant crystal structures.
- (3) Energy minimization: the "cluster representation" obtained from (2) needs to be further refined and optimized, involving all degrees of freedom.

Specific parameter setting:

- (1) Two single molecules were optimised using pbe1pbe/6-311g(d), using the optimised structure as a rigid body. Calculations of electrostatic and Van der Waals interactions were carried out by the Ewald long-range summation method.
- (2) The DREIDING 2.21 force field suitable for molecular crystals was selected.
- (3) Select four common spatial point groups:  $C2/c P\bar{1}$ ,  $P2_1$ ,  $P2_1/c$ , and  $P2_12_12_1$ .
- (4) The number of molecules in the asymmetric unit was chosen to be 1.
- (5) The maximum temperature for simulated annealing was 10000 K and the minimum was 300 K.

By using Multiwfn software package,<sup>1</sup> the natural atomic orbital (NAO) can be obtained from the density matrix information of the system by analyzing the natural bond orbital (NBO). The number for NAO is the same as for the original basis function. The part of the NAO known as the minimal set corresponds to atomic orbitals in the general sense. The orbital wave functions are generally written as linear expansions of the basic functions:<sup>2</sup>

$$\Phi_i = \sum_a C_{a,i} \chi_a$$

Where  $a$  represents the ordinal number of the basis function. There is no strict standard for definition of the  $\chi$  component of the orbital wave function, or the contribution  $\eta$  of  $\chi$  to the orbital wave function. Any definition that satisfies both the following conditions meets the basic requirements:

$$\eta_a \geq 0, \sum_a \eta_a = 100\%$$

Here,  $\eta_a$  is the contribution of basis function  $a$  to the orbital wavefunction. Suppose that the orbital wave function  $\Phi_i$  is an orthogonally normalized real function, written as:

$$\int \Phi_i^2(r) dr = 1$$

Where  $r$  represents three-dimensional space coordinates, then:

$$\sum_a C_{a,i}^2 + 2 \times \sum_a \sum_{b>a} C_{a,i} C_{b,i} S_{a,b} = 1$$

Thereinto:

$$S_{ab} = \int \chi_a(r) \chi_b(r) dr$$

The first term is treated as the sum of the independent contributions of the individual basis functions to the orbit which is called the localized term. The second term is the cross term, which embodies the joint contribution to the orbitals due to the coupling between the basis functions which satisfy the condition  $S_{a,b} = \delta_{a,b}$ .

## References

1. Tian Lu, Feiwu Chen, Multiwfn: A multifunctional wavefunction analyzer, *J. Comput. Chem.*, 2012, **33**(5), 580-592.
2. Tian Lu, Feiwu Chen, Calculation of molecular orbital composition, *Acta Chim. Sin.*, 2011, **69**(20), 2393-2406.

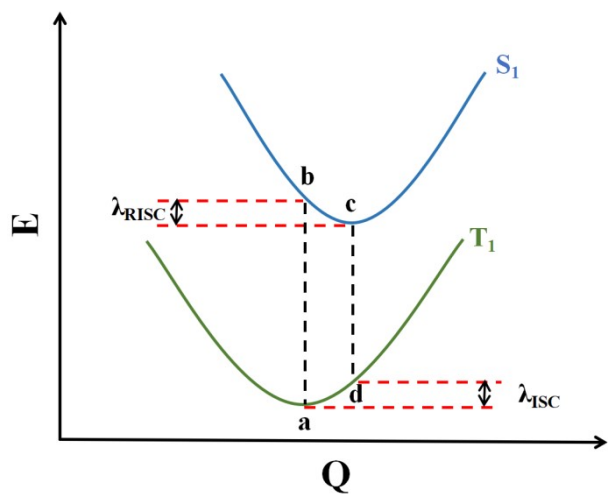

Figure S1. Schematic representation of the adiabatic potential energy surfaces for  $S_1$  and  $T_1$ .

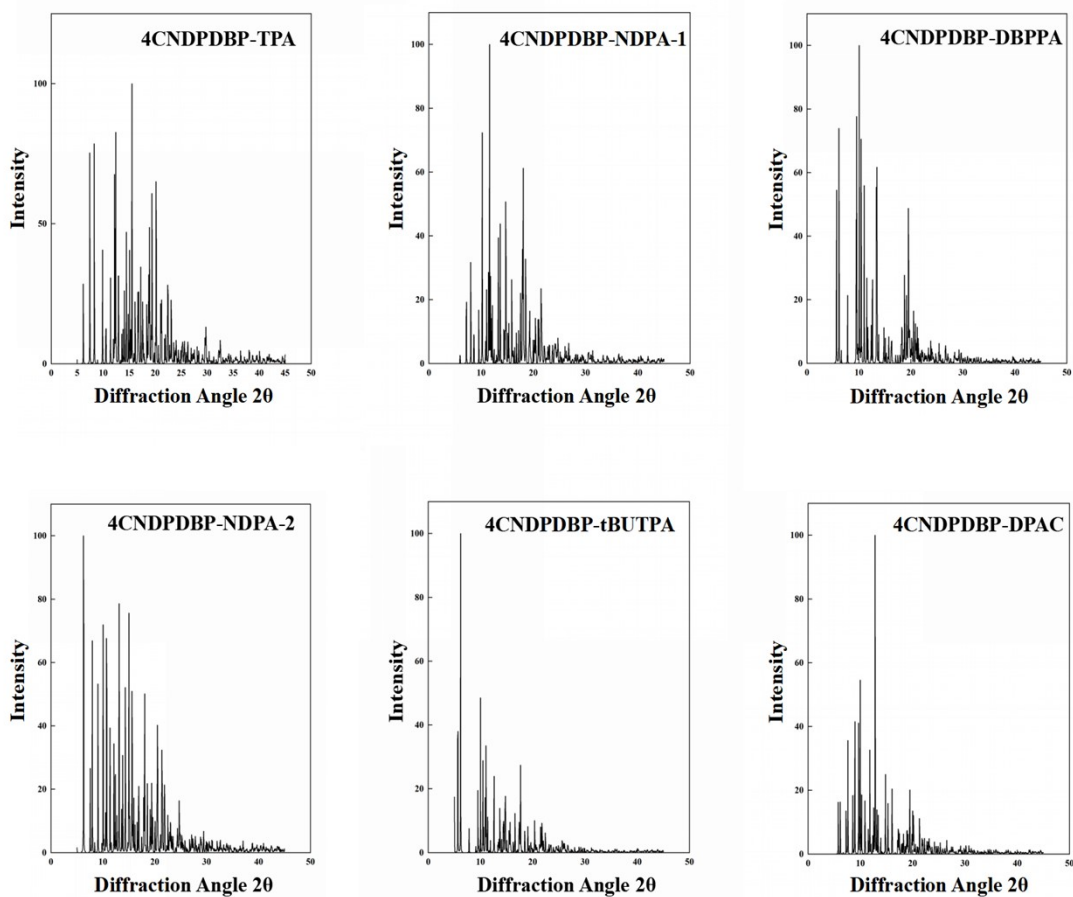

Figure S2. The simulated XRPD of chosen structures of 4CNDPDBP-TPA and the designed molecules.

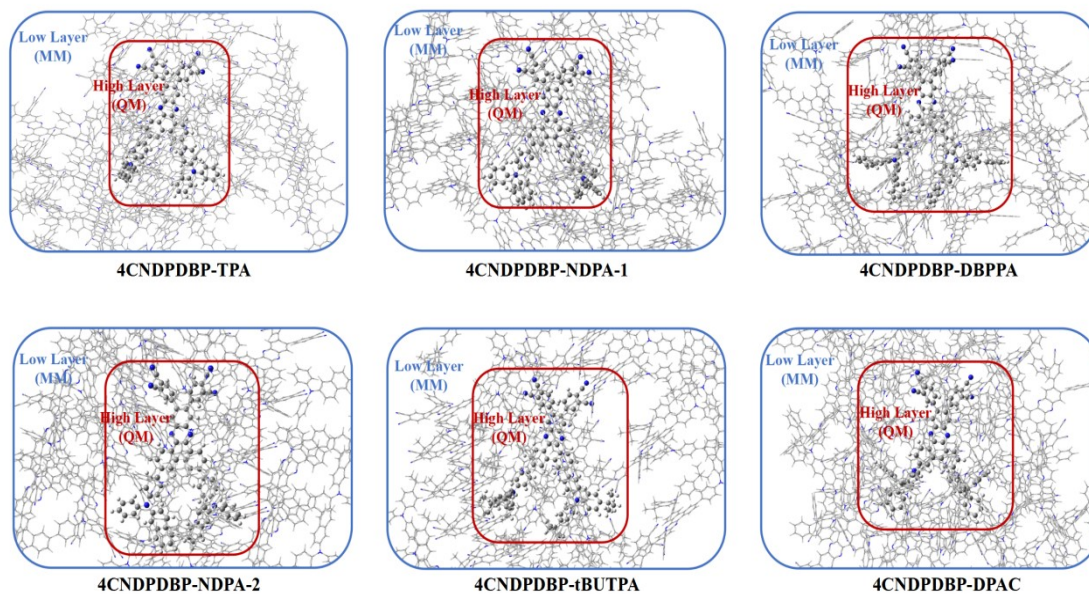

Figure S3. QM/MM models for 4CNDPDBP-TPA and the designed molecules in solid phase. Surrounding molecules are regarded as the low layer and the centered molecule is treated as the high layer

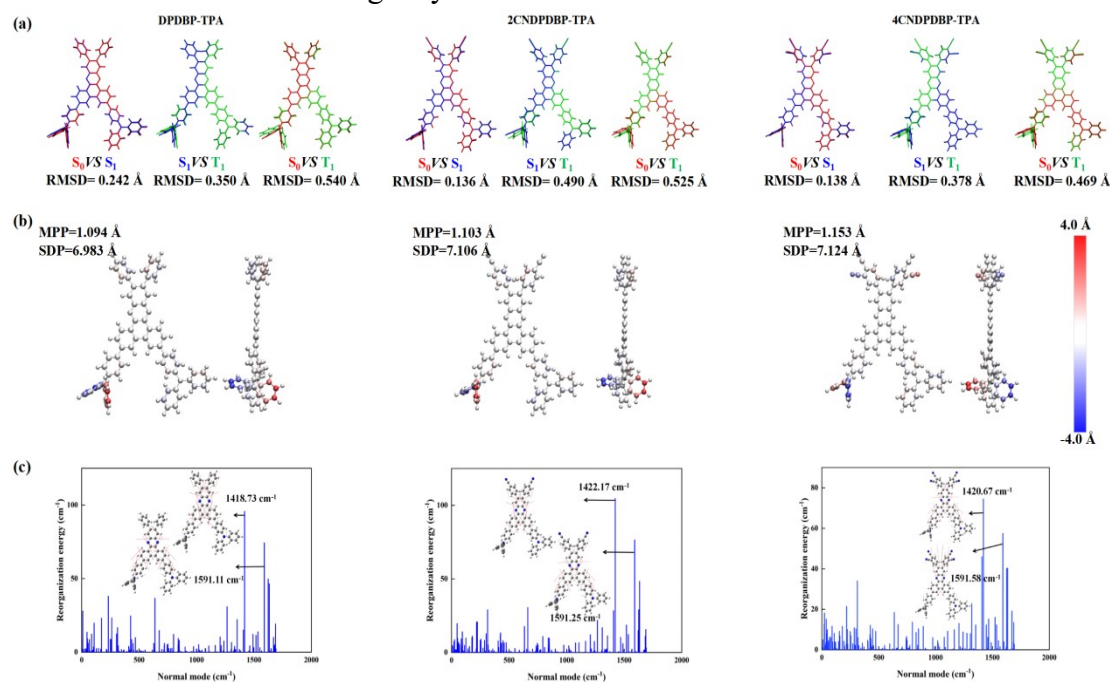

Figure S4. (a) Geometry comparisons and RMSD values of DPDBP-TPA, 2CNDPDBP-TPA and 4CNDPDBP-TPA among  $S_0$  (red),  $S_1$  (blue) and  $T_1$  (green) states. (b) Molecular planarity parameters for DPDBP-TPA, 2CNDPDBP-TPA and 4CNDPDBP-TPA. (c) Calculated reorganization energies *versus* the normal-mode frequencies for DPDBP-TPA, 2CNDPDBP-TPA and 4CNDPDBP-TPA. Representative vibration modes are shown as insets.

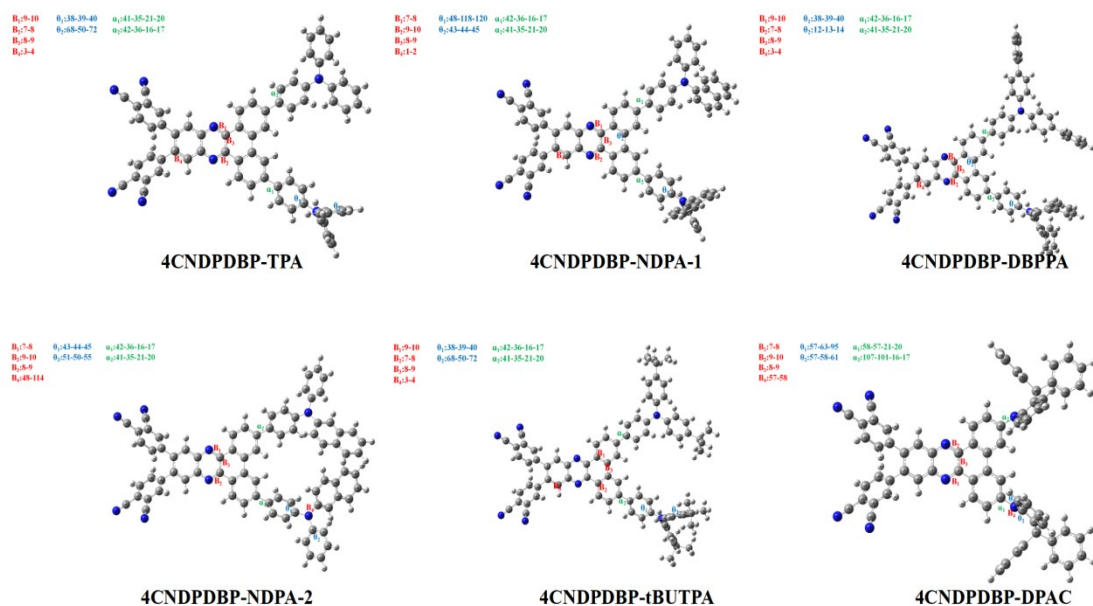

Figure S5. The atomic labels and the interesting bond lengths ( $B_1$ ,  $B_2$ ,  $B_3$  and  $B_4$ ), bond angles ( $\theta_1$  and  $\theta_2$ ) and the dihedral angles ( $\alpha_1$  and  $\alpha_2$ ) of 4CNDPDBP-TPA and the designed molecules.

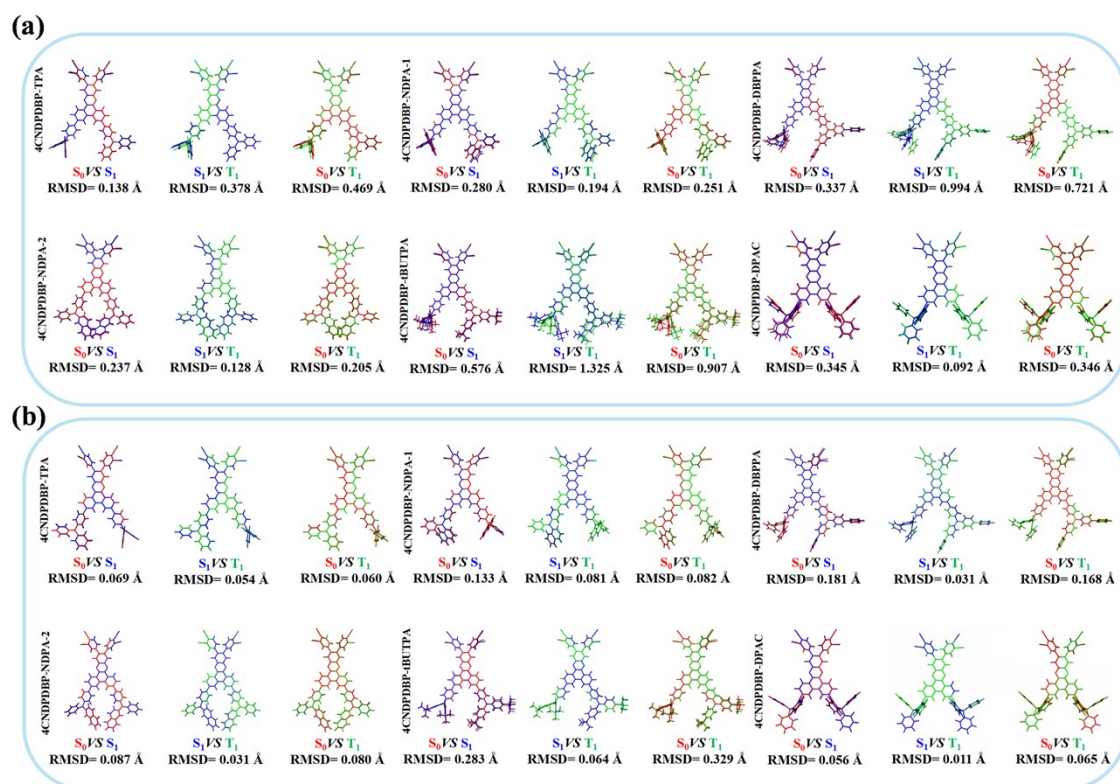

Figure S6. Geometry comparisons and RMSD values of 4CNDPDBP-TPA and the designed molecules (a) in toluene and (b) solid phase among  $S_0$  (red),  $S_1$  (blue) and  $T_1$  (green) states.

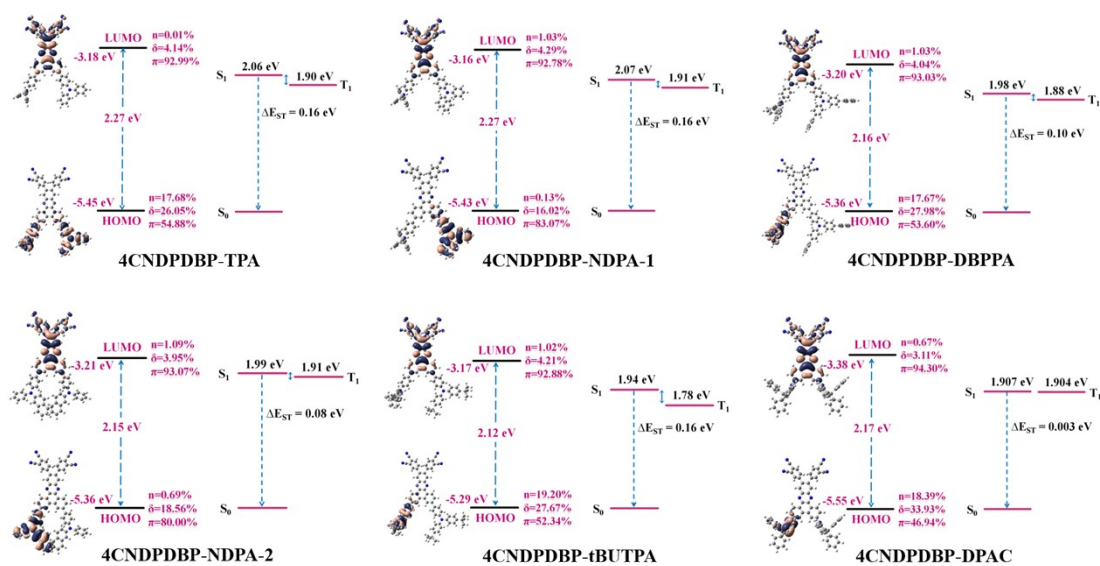

Figure S7. Adiabatic excitation energies and involved molecular orbital energies and distributions for 4CNDPDBP-TPA and the designed molecules in toluene.

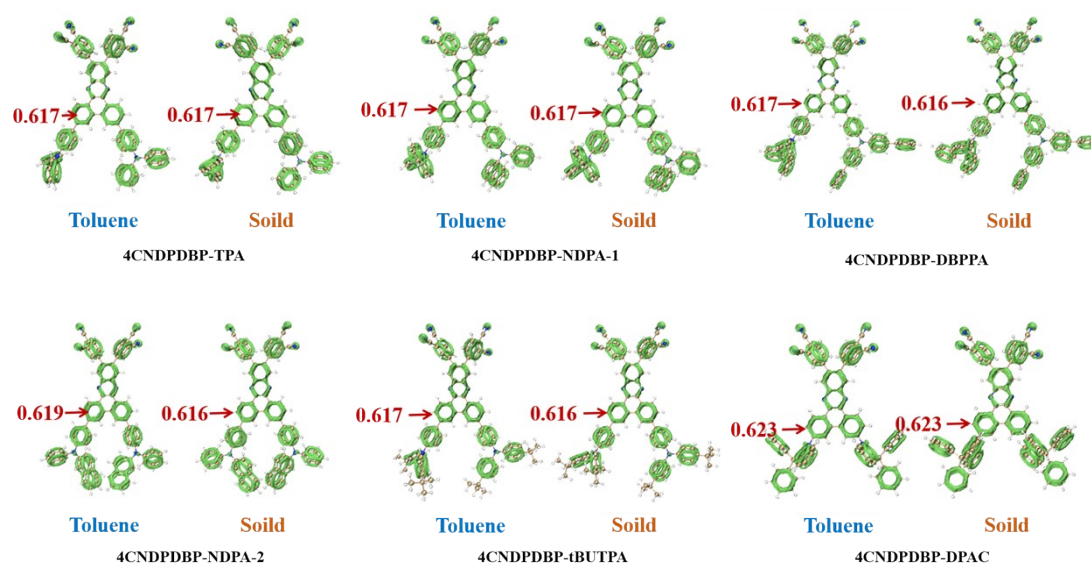

Figure S8. The localized orbital locator- $\pi$  (LOL- $\pi$ ) isosurfaces for 4CNDPDBP-TPA and the designed molecules in toluene and solid phase.

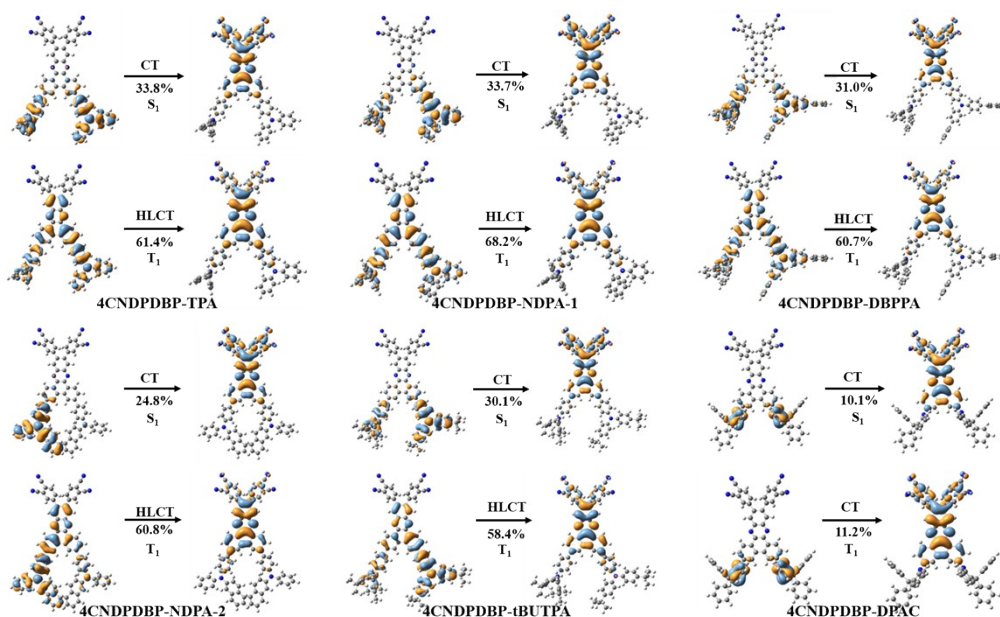

Figure S9. NTOs of the  $S_1$  and  $T_1$  states for 4CNDPDBP-TPA and the designed molecules in toluene. The values below the arrows are the LE proportions.

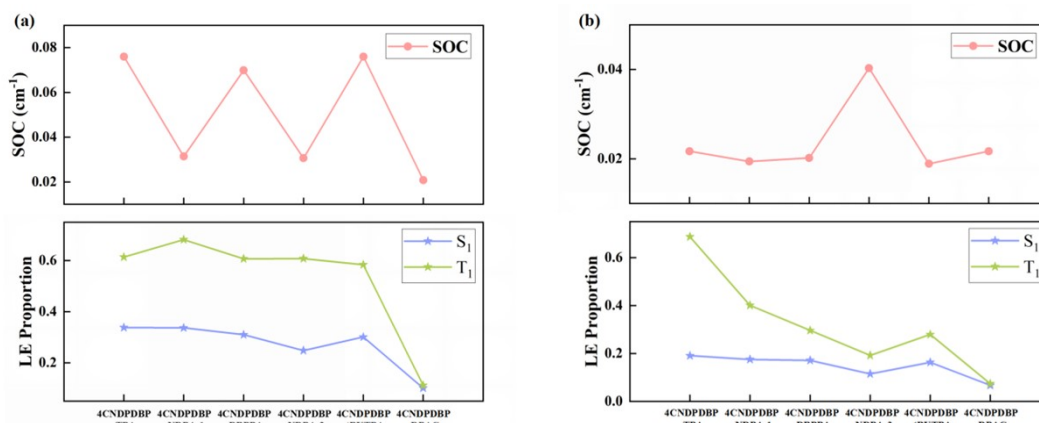

Figure S10. Qualitative correlation between LE% and SOCME for studied molecules.

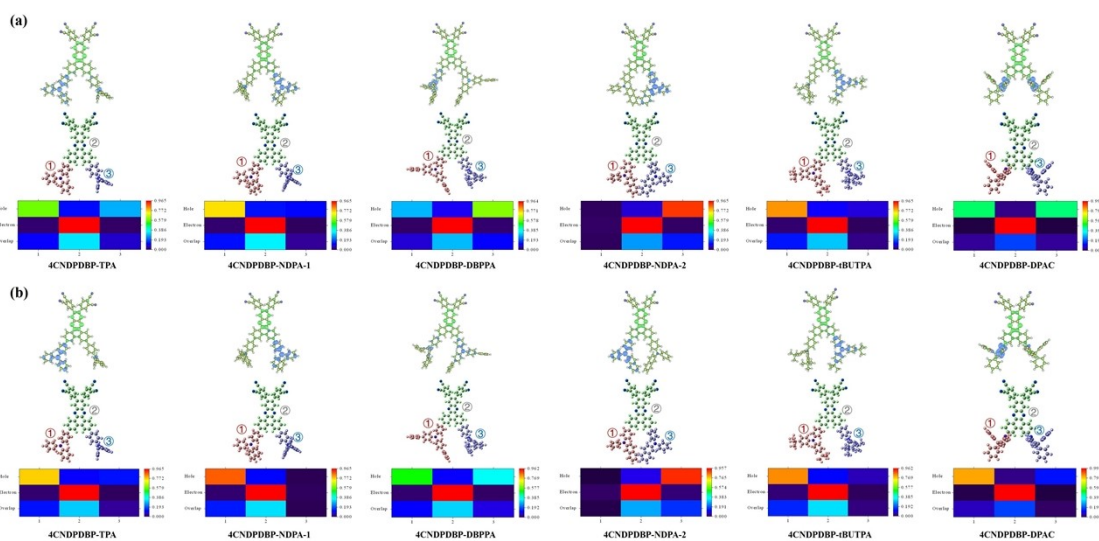

Figure S11. Distributions of holes and electrons as well as heat maps of the  $S_1$  state for 4CNDPDBP-TPA and the designed molecules in toluene (a) and solid phase (b).

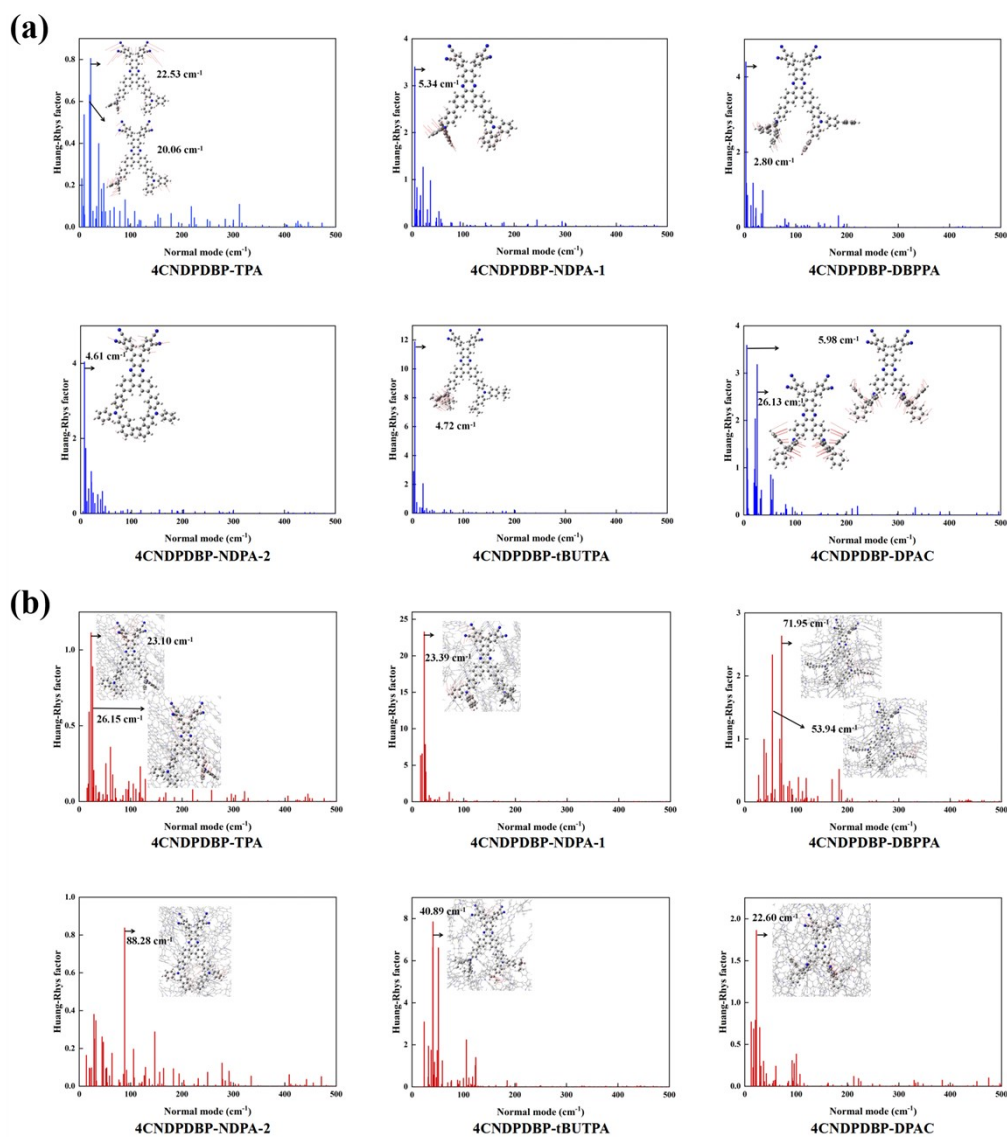

Figure S12. Calculated HR factors *versus* the normal-mode frequencies for 4CNDPDBP-TPA and the designed molecules (a) in toluene and (b) solid phase. Representative vibration modes are shown as insets.



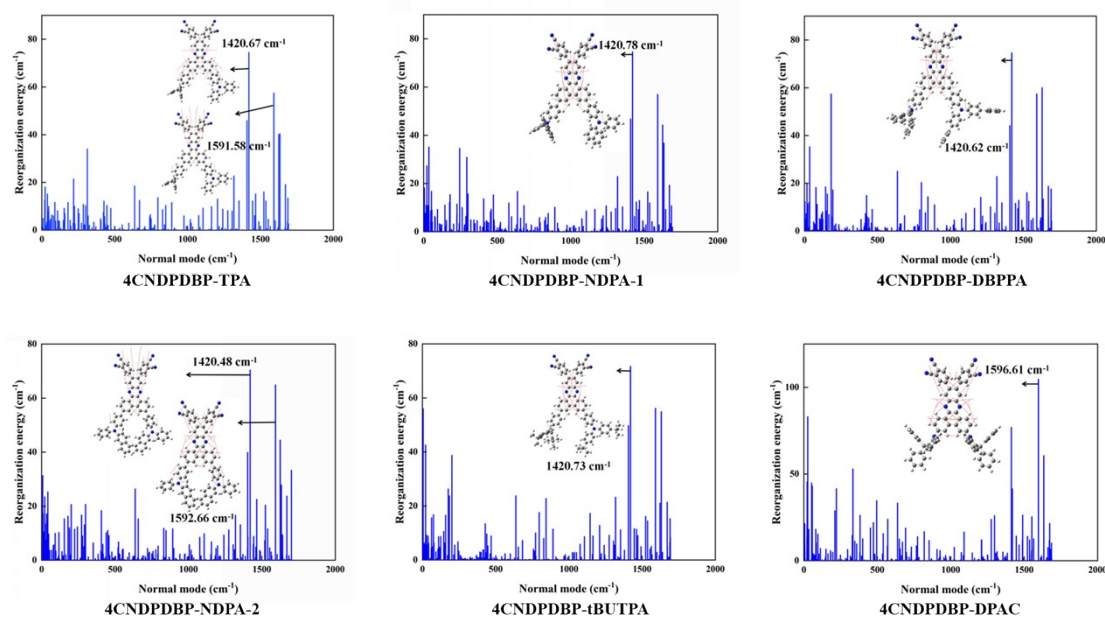

Figure S13. Calculated reorganization energies *versus* the normal-mode frequencies for 4CNDPDBP-TPA and the designed molecules in toluene. Representative vibration modes are shown as insets.

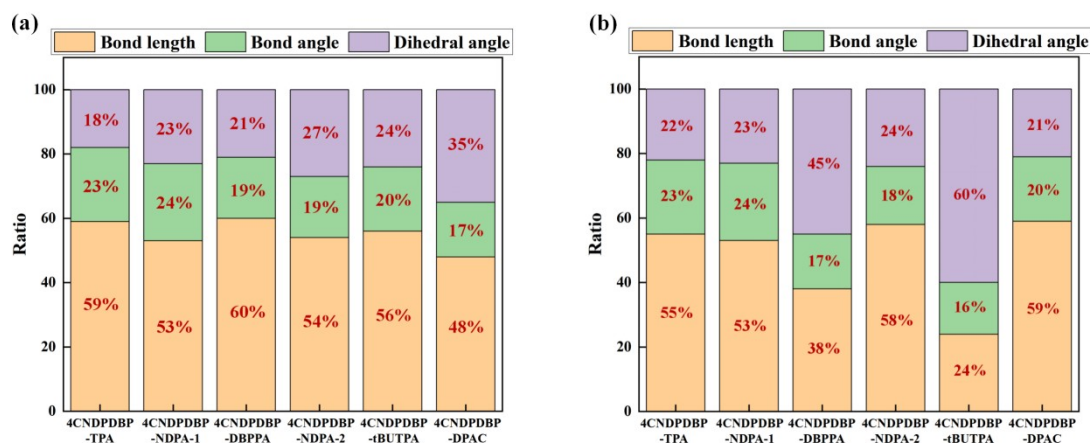

Figure S14. Contributions of the reorganization energies from bond lengths (orange), bond angles (green) and dihedral angles (purple) for 4CNDPDBP-TPA and the designed molecules.

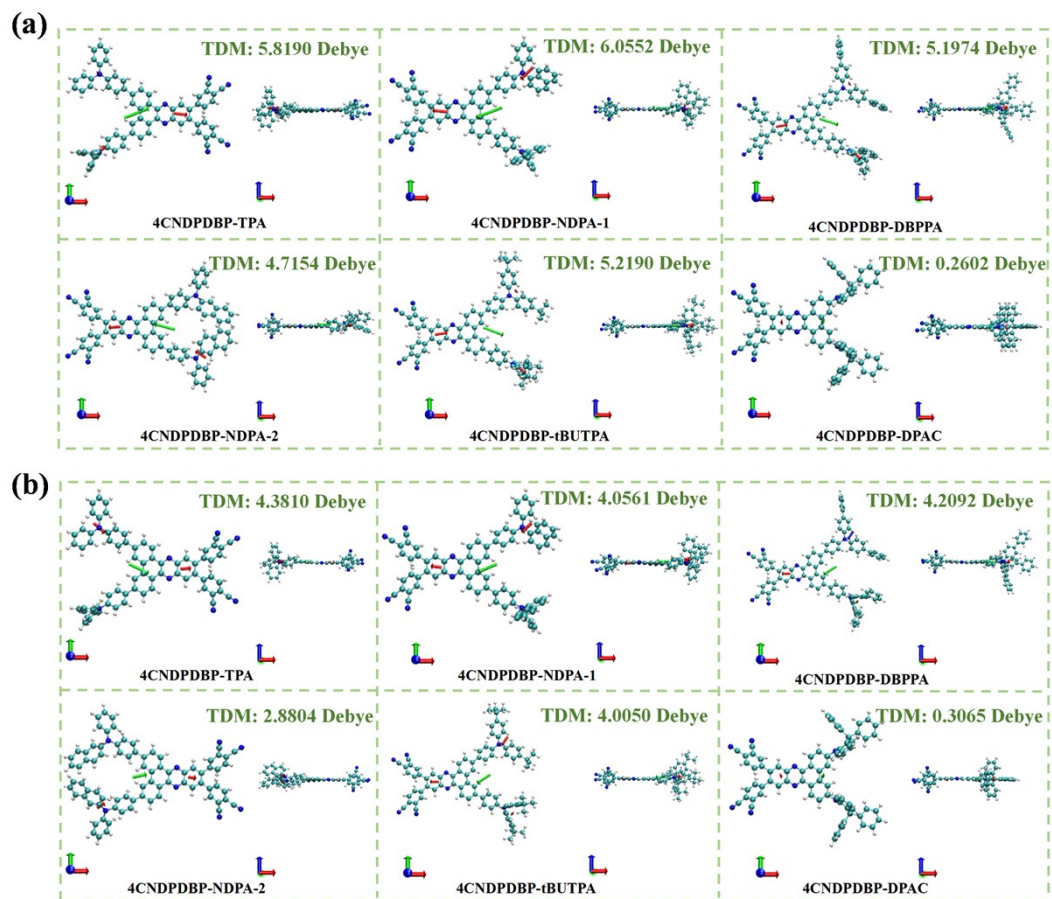

Figure S15. Fragment transition dipole moment vector (red) and the whole transition dipole moment vector (green) of 4CNDPDBP-TPA and the designed molecules (a) in toluene and (b) solid phase.

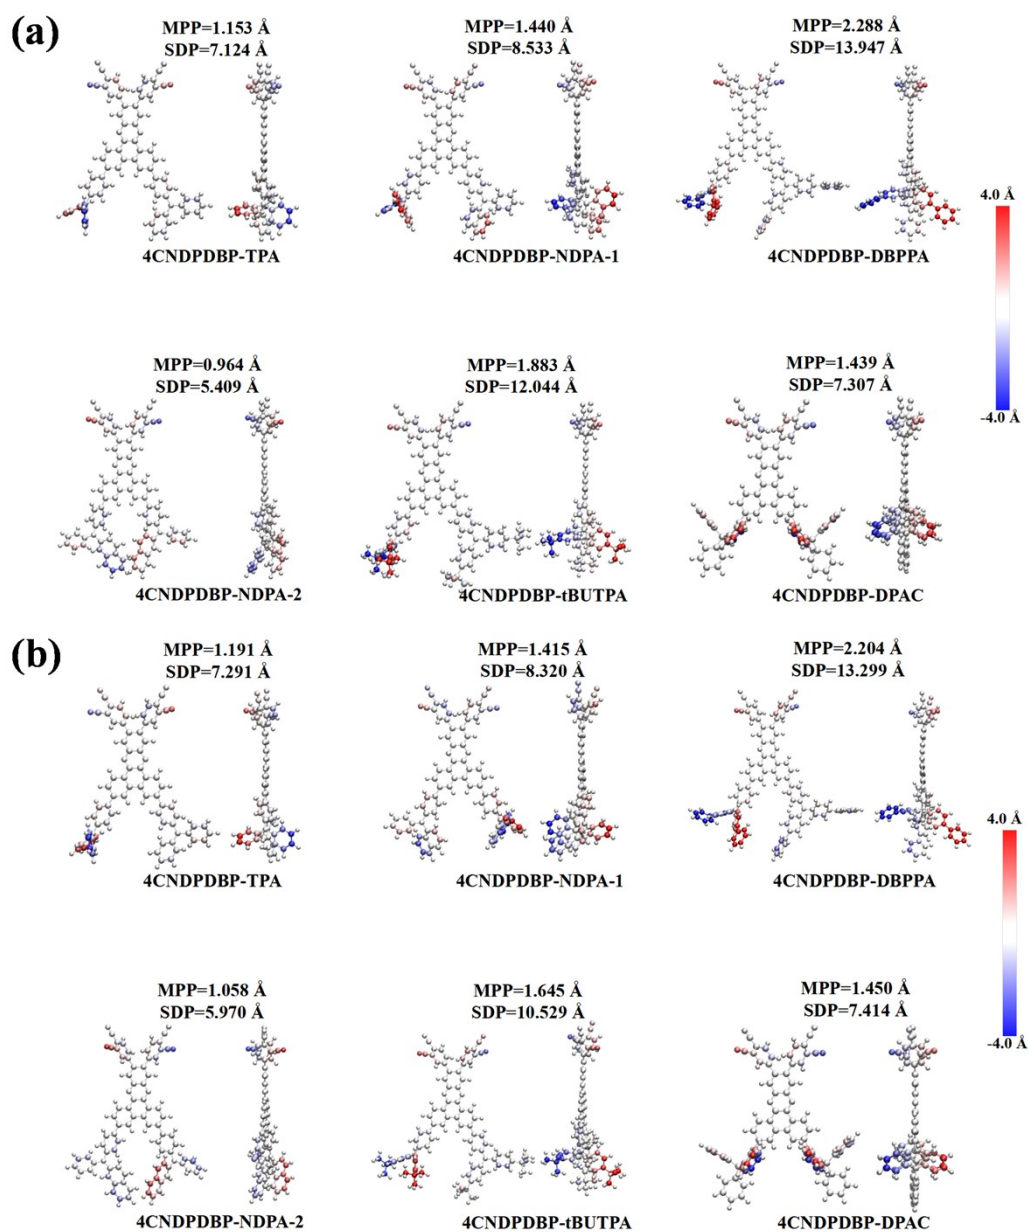

Figure S16. Molecular planarity parameters for 4CNDPDBP-TPA and the designed molecules (a) in toluene and (b) solid phase.

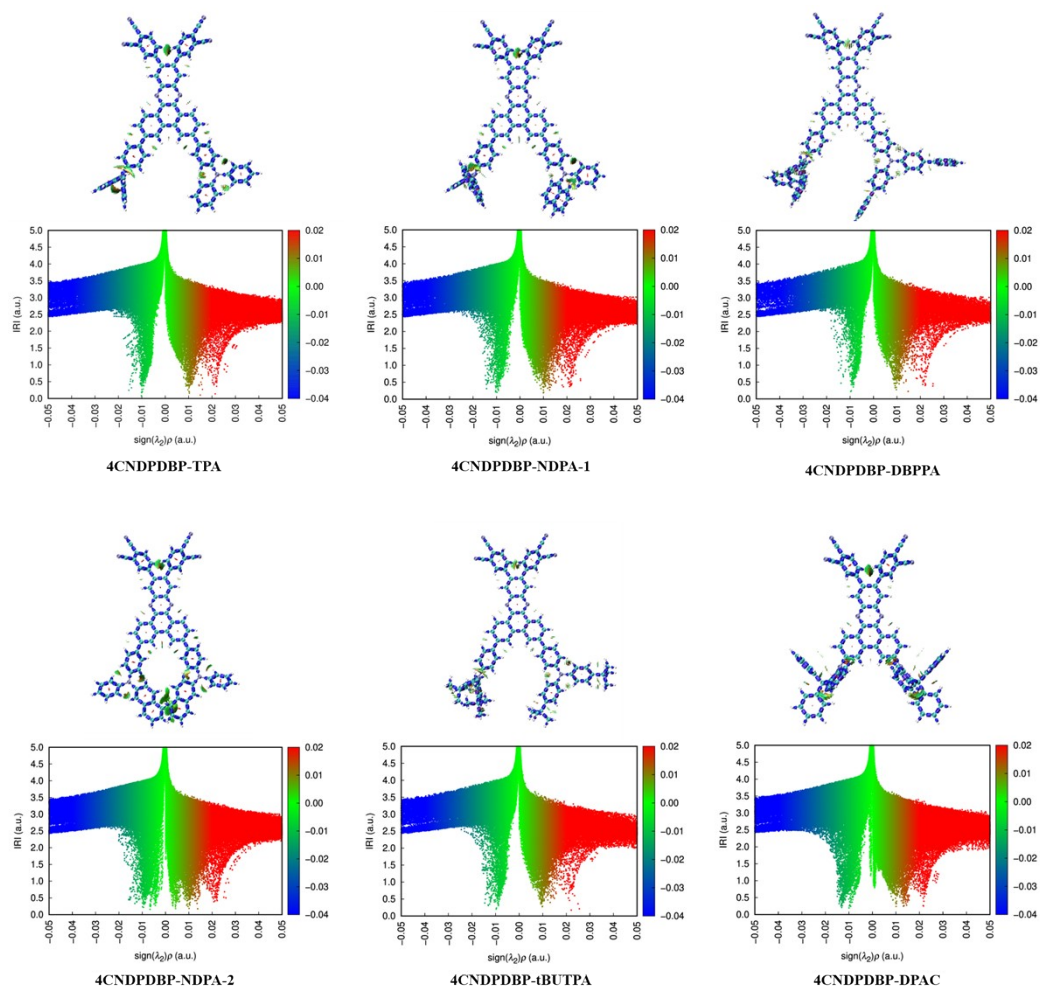

Figure S17. IRI graphical analyses of weak interactions of 4CNDPDBP-TPA and the designed molecules in toluene.

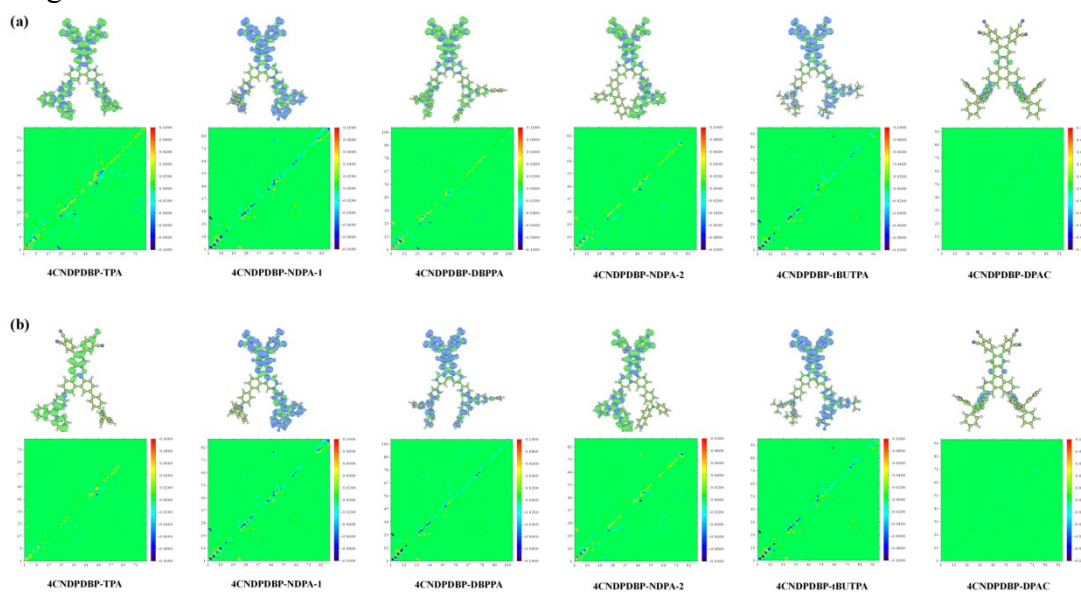

Figure S18. The X component of the transition dipole moment matrix and the sosurface of the X component of the transition dipole moment density ( $T_x(r)$ ) for 4CNDPDBP-TPA and the designed molecules (a) in toluene and (b) solid phase.

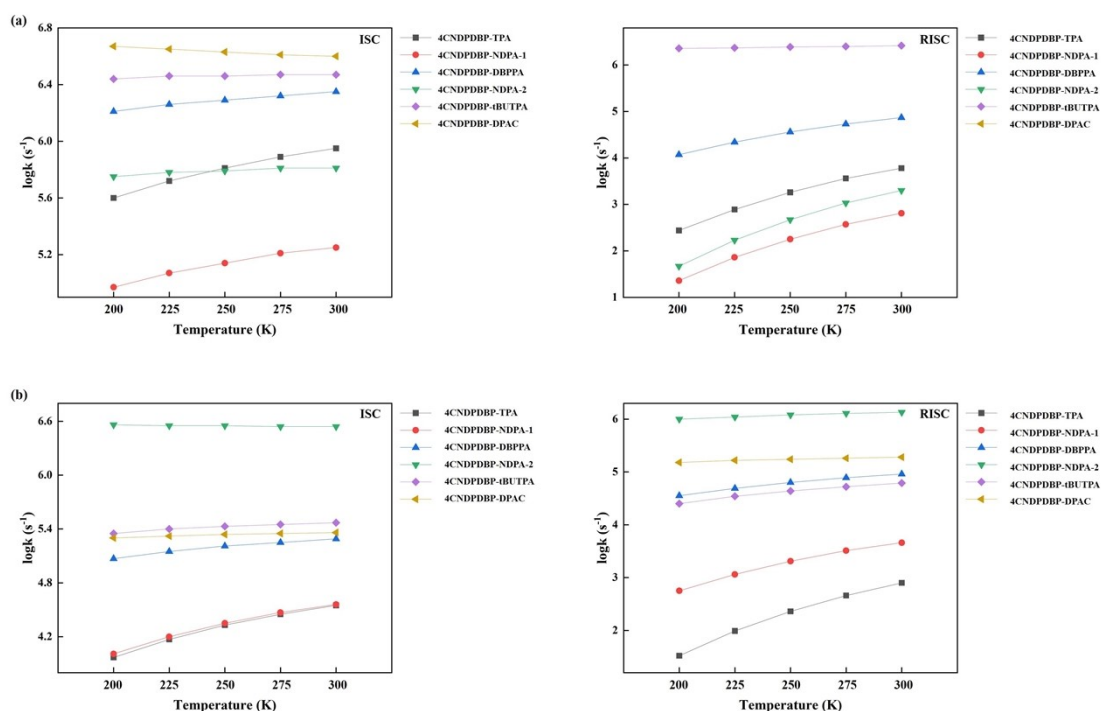

Figure S19. Variations of the ISC and RISC rates with temperature for 4CNDPDBP-TPA and the designed molecules in toluene (a) and solid phase (b).

Table S1. Geometry parameters of  $S_0$ ,  $S_1$  and  $T_1$  states for 4CNDPDBP-TPA in toluene as well as their differences ( $\Delta$ ). (Bond length: Å. Bond angle: °. Dihedral angle: °)

|                | Geometry   | Atomic number | $S_0$  | $S_1$  | $T_1$  | $\Delta S_0-S_1 $ | $\Delta S_1-T_1 $ |
|----------------|------------|---------------|--------|--------|--------|-------------------|-------------------|
| Bond length    | $B_1$      | 9-10          | 1.319  | 1.347  | 1.332  | 0.028             | 0.015             |
|                | $B_2$      | 7-8           | 1.319  | 1.343  | 1.356  | 0.024             | 0.013             |
|                | $B_3$      | 8-9           | 1.439  | 1.409  | 1.419  | 0.030             | 0.010             |
|                | $B_4$      | 3-4           | 1.375  | 1.391  | 1.386  | 0.016             | 0.005             |
| Bond angle     | $\theta_1$ | 38-39-40      | 118.4  | 119.6  | 118.4  | 1.2               | 1.2               |
|                | $\theta_2$ | 68-50-72      | 119.2  | 120.3  | 120.2  | 1.1               | 0.1               |
| Dihedral angle | $\alpha_1$ | 41-35-21-20   | 37.09  | 35.86  | 21.96  | 1.23              | 13.9              |
|                | $\alpha_2$ | 42-36-16-17   | -36.42 | -37.38 | -37.26 | 0.96              | 0.12              |

Table S2. Geometry parameters of  $S_0$ ,  $S_1$  and  $T_1$  states for 4CNDPDBP-TPA in solid phase as well as their differences ( $\Delta$ ). (Bond length: Å. Bond angle: °. Dihedral angle: °)

|             | Geometry | Atomic number | $S_0$ | $S_1$ | $T_1$ | $\Delta S_0-S_1 $ | $\Delta S_1-T_1 $ |
|-------------|----------|---------------|-------|-------|-------|-------------------|-------------------|
| Bond length | $B_1$    | 9-10          | 1.321 | 1.343 | 1.350 | 0.022             | 0.007             |
|             | $B_2$    | 7-8           | 1.318 | 1.345 | 1.337 | 0.027             | 0.008             |
|             | $B_3$    | 8-9           | 1.441 | 1.405 | 1.410 | 0.036             | 0.005             |
|             | $B_4$    | 3-4           | 1.377 | 1.390 | 1.395 | 0.013             | 0.005             |

|                |            |             |        |        |        |      |      |
|----------------|------------|-------------|--------|--------|--------|------|------|
| Bond angle     | $\theta_1$ | 38-39-40    | 118.8  | 118.8  | 118.8  | 0    | 0    |
|                | $\theta_2$ | 68-50-72    | 118.9  | 118.7  | 118.8  | 0.2  | 0.1  |
| Dihedral angle | $\alpha_1$ | 41-35-21-20 | 37.64  | 37.35  | 37.82  | 0.29 | 0.47 |
|                | $\alpha_2$ | 42-36-16-17 | -39.26 | -44.16 | -36.66 | 4.90 | 7.50 |

Table S3. Geometry parameters of  $S_0$ ,  $S_1$  and  $T_1$  states for 4CNDPDBP-NDPA-1 in toluene as well as their differences ( $\Delta$ ). (Bond length: Å. Bond angle: °. Dihedral angle: °)

|                | Geometry   | Atomic number | $S_0$  | $S_1$  | $T_1$  | $\Delta S_0-S_1 $ | $\Delta S_1-T_1 $ |
|----------------|------------|---------------|--------|--------|--------|-------------------|-------------------|
| Bond length    | $B_1$      | 7-8           | 1.319  | 1.347  | 1.332  | 0.028             | 0.015             |
|                | $B_2$      | 9-10          | 1.319  | 1.343  | 1.356  | 0.024             | 0.013             |
|                | $B_3$      | 8-9           | 1.439  | 1.409  | 1.419  | 0.030             | 0.010             |
|                | $B_4$      | 1-2           | 1.375  | 1.391  | 1.386  | 0.016             | 0.005             |
| Bond angle     | $\theta_1$ | 48-118-120    | 119.7  | 117.8  | 118.5  | 1.9               | 0.7               |
|                | $\theta_2$ | 43-44-45      | 118.4  | 119.6  | 118.5  | 1.2               | 1.1               |
| Dihedral angle | $\alpha_1$ | 42-36-16-17   | -36.88 | -35.52 | -22.94 | 1.36              | 12.58             |
|                | $\alpha_2$ | 41-35-21-20   | 36.68  | 38.09  | 37.69  | 1.41              | 0.40              |

Table S4. Geometry parameters of  $S_0$ ,  $S_1$  and  $T_1$  states for 4CNDPDBP-NDPA-1 in solid phase as well as their differences ( $\Delta$ ). (Bond length: Å. Bond angle: °. Dihedral angle: °)

|                | Geometry   | Atomic number | $S_0$  | $S_1$  | $T_1$  | $\Delta S_0-S_1 $ | $\Delta S_1-T_1 $ |
|----------------|------------|---------------|--------|--------|--------|-------------------|-------------------|
| Bond length    | $B_1$      | 7-8           | 1.317  | 1.347  | 1.340  | 0.030             | 0.007             |
|                | $B_2$      | 9-10          | 1.321  | 1.338  | 1.350  | 0.017             | 0.012             |
|                | $B_3$      | 8-9           | 1.442  | 1.407  | 1.410  | 0.035             | 0.003             |
|                | $B_4$      | 1-2           | 1.377  | 1.394  | 1.390  | 0.017             | 0.004             |
| Bond angle     | $\theta_1$ | 48-118-120    | 120.0  | 118.2  | 118.4  | 1.8               | 0.2               |
|                | $\theta_2$ | 43-44-45      | 118.6  | 120.2  | 119.3  | 1.6               | 0.9               |
| Dihedral angle | $\alpha_1$ | 42-36-16-17   | -39.93 | -44.75 | -37.02 | 4.82              | 7.73              |
|                | $\alpha_2$ | 41-35-21-20   | 35.79  | 36.25  | 36.66  | 0.46              | 0.41              |

Table S5. Geometry parameters of  $S_0$ ,  $S_1$  and  $T_1$  states for 4CNDPDBP-DBPPA in toluene as well as their differences ( $\Delta$ ). (Bond length: Å. Bond angle: °. Dihedral angle: °)

|             | Geometry | Atomic number | $S_0$ | $S_1$ | $T_1$ | $\Delta S_0-S_1 $ | $\Delta S_1-T_1 $ |
|-------------|----------|---------------|-------|-------|-------|-------------------|-------------------|
| Bond length | $B_1$    | 9-10          | 1.319 | 1.346 | 1.334 | 0.027             | 0.012             |
|             | $B_2$    | 7-8           | 1.319 | 1.344 | 1.354 | 0.025             | 0.010             |
|             | $B_3$    | 8-9           | 1.439 | 1.410 | 1.418 | 0.029             | 0.008             |
|             | $B_4$    | 3-4           | 1.375 | 1.391 | 1.387 | 0.016             | 0.004             |

|                |            |             |        |        |        |      |       |
|----------------|------------|-------------|--------|--------|--------|------|-------|
| Bond angle     | $\theta_1$ | 38-39-40    | 118.5  | 120.0  | 118.7  | 1.5  | 1.3   |
|                | $\theta_2$ | 12-13-14    | 120.0  | 119.2  | 119.3  | 0.8  | 0.1   |
| Dihedral angle | $\alpha_1$ | 42-36-16-17 | -36.70 | -37.94 | -38.15 | 1.24 | 0.21  |
|                | $\alpha_2$ | 41-35-21-20 | 37.36  | 37.40  | 23.93  | 0.04 | 13.47 |

Table S6. Geometry parameters of  $S_0$ ,  $S_1$  and  $T_1$  states for 4CNDPDBP-DBPPA in solid phase as well as their differences ( $\Delta$ ). (Bond length: Å. Bond angle: °. Dihedral angle: °)

|                | Geometry   | Atomic number | $S_0$  | $S_1$  | $T_1$  | $\Delta S_0-S_1 $ | $\Delta S_1-T_1 $ |
|----------------|------------|---------------|--------|--------|--------|-------------------|-------------------|
| Bond length    | $B_1$      | 9-10          | 1.320  | 1.340  | 1.346  | 0.020             | 0.006             |
|                | $B_2$      | 7-8           | 1.320  | 1.350  | 1.345  | 0.030             | 0.005             |
|                | $B_3$      | 8-9           | 1.443  | 1.406  | 1.408  | 0.037             | 0.002             |
|                | $B_4$      | 3-4           | 1.376  | 1.387  | 1.391  | 0.011             | 0.004             |
| Bond angle     | $\theta_1$ | 38-39-40      | 117.9  | 118.0  | 118.0  | 0.1               | 0                 |
|                | $\theta_2$ | 12-13-14      | 120.3  | 120.0  | 119.9  | 0.3               | 0.1               |
| Dihedral angle | $\alpha_1$ | 42-36-16-17   | -33.00 | -39.19 | -34.38 | 6.19              | 4.81              |
|                | $\alpha_2$ | 41-35-21-20   | 37.76  | 39.36  | 39.45  | 1.6               | 0.09              |

Table S7. Geometry parameters of  $S_0$ ,  $S_1$  and  $T_1$  states for 4CNDPDBP-NDPA-2 in toluene as well as their differences ( $\Delta$ ). (Bond length: Å. Bond angle: °. Dihedral angle: °)

|                | Geometry   | Atomic number | $S_0$  | $S_1$  | $T_1$  | $\Delta S_0-S_1 $ | $\Delta S_1-T_1 $ |
|----------------|------------|---------------|--------|--------|--------|-------------------|-------------------|
| Bond length    | $B_1$      | 7-8           | 1.319  | 1.346  | 1.335  | 0.027             | 0.011             |
|                | $B_2$      | 9-10          | 1.319  | 1.343  | 1.352  | 0.024             | 0.009             |
|                | $B_3$      | 8-9           | 1.444  | 1.414  | 1.421  | 0.030             | 0.007             |
|                | $B_4$      | 48-114        | 1.415  | 1.392  | 1.410  | 0.023             | 0.018             |
| Bond angle     | $\theta_1$ | 43-44-45      | 118.6  | 120.1  | 119.0  | 1.5               | 1.1               |
|                | $\theta_2$ | 51-50-55      | 119.1  | 120.3  | 120.2  | 1.2               | 0.1               |
| Dihedral angle | $\alpha_1$ | 42-36-16-17   | -47.63 | -48.59 | -35.81 | 0.96              | 12.78             |
|                | $\alpha_2$ | 41-35-21-20   | 35.50  | 37.73  | 36.89  | 2.23              | 0.84              |

Table S8. Geometry parameters of  $S_0$ ,  $S_1$  and  $T_1$  states for 4CNDPDBP-NDPA-2 in solid phase as well as their differences ( $\Delta$ ). (Bond length: Å. Bond angle: °. Dihedral angle: °)

|             | Geometry | Atomic number | $S_0$ | $S_1$ | $T_1$ | $\Delta S_0-S_1 $ | $\Delta S_1-T_1 $ |
|-------------|----------|---------------|-------|-------|-------|-------------------|-------------------|
| Bond length | $B_1$    | 7-8           | 1.319 | 1.339 | 1.342 | 0.020             | 0.003             |
|             | $B_2$    | 9-10          | 1.319 | 1.347 | 1.346 | 0.028             | 0.001             |
|             | $B_3$    | 8-9           | 1.448 | 1.410 | 1.342 | 0.038             | 0.068             |
|             | $B_4$    | 48-114        | 1.415 | 1.407 | 1.407 | 0.008             | 0                 |

|                |            |             |        |        |        |      |      |
|----------------|------------|-------------|--------|--------|--------|------|------|
| Bond angle     | $\theta_1$ | 43-44-45    | 118.5  | 118.7  | 118.7  | 0.2  | 0    |
|                | $\theta_2$ | 51-50-55    | 119.0  | 118.9  | 118.9  | 0.1  | 0    |
| Dihedral angle | $\alpha_1$ | 42-36-16-17 | -35.70 | -39.26 | -39.35 | 3.56 | 0.09 |
|                | $\alpha_2$ | 41-35-21-20 | 30.00  | 33.80  | 30.68  | 3.80 | 3.12 |

Table S9. Geometry parameters of  $S_0$ ,  $S_1$  and  $T_1$  states for 4CNDPDBP-tBUTPA in toluene as well as their differences ( $\Delta$ ). (Bond length: Å. Bond angle: °. Dihedral angle: °)

|                | Geometry   | Atomic number | $S_0$  | $S_1$  | $T_1$  | $\Delta S_0-S_1 $ | $\Delta S_1-T_1 $ |
|----------------|------------|---------------|--------|--------|--------|-------------------|-------------------|
| Bond length    | $B_1$      | 9-10          | 1.319  | 1.347  | 1.333  | 0.028             | 0.014             |
|                | $B_2$      | 7-8           | 1.319  | 1.343  | 1.354  | 0.024             | 0.011             |
|                | $B_3$      | 8-9           | 1.440  | 1.409  | 1.420  | 0.031             | 0.011             |
|                | $B_4$      | 3-4           | 1.375  | 1.391  | 1.420  | 0.016             | 0.029             |
| Bond angle     | $\theta_1$ | 38-39-40      | 118.2  | 120.6  | 118.3  | 2.4               | 2.3               |
|                | $\theta_2$ | 68-50-72      | 118.5  | 119.3  | 119.5  | 0.8               | 0.2               |
| Dihedral angle | $\alpha_1$ | 42-36-16-17   | -36.58 | -37.83 | -42.35 | 1.25              | 4.52              |
|                | $\alpha_2$ | 41-35-21-20   | 35.87  | 38.53  | 17.25  | 2.66              | 21.28             |

Table S10. Geometry parameters of  $S_0$ ,  $S_1$  and  $T_1$  states for 4CNDPDBP-tBUTPA in solid phase as well as their differences ( $\Delta$ ). (Bond length: Å. Bond angle: °. Dihedral angle: °)

|                | Geometry   | Atomic number | $S_0$  | $S_1$  | $T_1$  | $\Delta S_0-S_1 $ | $\Delta S_1-T_1 $ |
|----------------|------------|---------------|--------|--------|--------|-------------------|-------------------|
| Bond length    | $B_1$      | 9-10          | 1.321  | 1.341  | 1.347  | 0.020             | 0.006             |
|                | $B_2$      | 7-8           | 1.374  | 1.347  | 1.341  | 0.027             | 0.006             |
|                | $B_3$      | 8-9           | 1.443  | 1.406  | 1.408  | 0.037             | 0.002             |
|                | $B_4$      | 3-4           | 1.374  | 1.383  | 1.388  | 0.009             | 0.005             |
| Bond angle     | $\theta_1$ | 38-39-40      | 117.6  | 117.5  | 117.5  | 0.1               | 0                 |
|                | $\theta_2$ | 68-50-72      | 118.7  | 118.5  | 118.5  | 0.2               | 0                 |
| Dihedral angle | $\alpha_1$ | 42-36-16-17   | -33.99 | -41.09 | -37.11 | 7.10              | 3.98              |
|                | $\alpha_2$ | 41-35-21-20   | 35.01  | 35.73  | 35.52  | 0.72              | 0.21              |

Table S11. Geometry parameters of  $S_0$ ,  $S_1$  and  $T_1$  states for 4CNDPDBP-DPAC in toluene as well as their differences ( $\Delta$ ). (Bond length: Å. Bond angle: °. Dihedral angle: °)

|             | Geometry | Atomic number | $S_0$ | $S_1$ | $T_1$ | $\Delta S_0-S_1 $ | $\Delta S_1-T_1 $ |
|-------------|----------|---------------|-------|-------|-------|-------------------|-------------------|
| Bond length | $B_1$    | 7-8           | 1.319 | 1.346 | 1.347 | 0.027             | 0.001             |
|             | $B_2$    | 9-10          | 1.319 | 1.341 | 1.340 | 0.022             | 0.001             |
|             | $B_3$    | 8-9           | 1.436 | 1.411 | 1.411 | 0.025             | 0                 |
|             | $B_4$    | 57-58         | 1.400 | 1.377 | 1.377 | 0.023             | 0                 |



|                |            |               |        |        |        |      |       |
|----------------|------------|---------------|--------|--------|--------|------|-------|
| Bond angle     | $\theta_1$ | 57-63-95      | 121.7  | 119.7  | 119.7  | 2.0  | 0     |
|                | $\theta_2$ | 57-58-61      | 121.6  | 119.8  | 119.9  | 1.8  | -0.1  |
| Dihedral angle | $\alpha_1$ | 58-57-21-20   | 96.30  | 93.95  | 97.49  | 2.35 | -3.54 |
|                | $\alpha_2$ | 107-101-16-17 | -97.93 | -97.96 | -97.90 | 0.03 | -0.06 |

Table S12. Geometry parameters of  $S_0$ ,  $S_1$  and  $T_1$  states for 4CNDPDBP-DPAC in solid phase as well as their differences ( $\Delta$ ). (Bond length: Å. Bond angle: °. Dihedral angle: °)

|                | Geometry   | Atomic number | $S_0$  | $S_1$  | $T_1$  | $\Delta S_0-S_1 $ | $\Delta S_1-T_1 $ |
|----------------|------------|---------------|--------|--------|--------|-------------------|-------------------|
| Bond length    | $B_1$      | 7-8           | 1.319  | 1.345  | 1.345  | 0.026             | 0                 |
|                | $B_2$      | 9-10          | 1.320  | 1.346  | 1.346  | 0.026             | 0                 |
|                | $B_3$      | 8-9           | 1.440  | 1.406  | 1.406  | 0.034             | 0                 |
|                | $B_4$      | 57-58         | 1.400  | 1.398  | 1.398  | 0.002             | 0                 |
| Bond angle     | $\theta_1$ | 57-63-95      | 121.3  | 121.3  | 121.3  | 0                 | 0                 |
|                | $\theta_2$ | 57-58-61      | 121.4  | 121.4  | 121.4  | 0                 | 0                 |
| Dihedral angle | $\alpha_1$ | 58-57-21-20   | 92.83  | 95.15  | 95.11  | 2.32              | 0.04              |
|                | $\alpha_2$ | 107-101-16-17 | -100.8 | -94.40 | -94.86 | 6.40              | 0.46              |

Table S13. Reorganization energies (meV) for 4CNDPDBP-TPA and the designed molecules in toluene and solid phase contributed from low frequency regions ( $<500\text{ cm}^{-1}$ ), middle frequency regions ( $500\text{-}1500\text{ cm}^{-1}$ ) and high frequency regions ( $>1500\text{ cm}^{-1}$ ).

|         |                 | Reorganization energies (meV) |                  |                |       |
|---------|-----------------|-------------------------------|------------------|----------------|-------|
|         |                 | Low frequency                 | Middle frequency | High frequency | Total |
| Toluene | 4CNDPDBP-TPA    | 46.0                          | 53.1             | 28.1           | 127.2 |
|         | 4CNDPDBP-NDPA-1 | 60.2                          | 56.5             | 29.6           | 146.3 |
|         | 4CNDPDBP-DBPPA  | 53.5                          | 55.3             | 30.8           | 139.6 |
|         | 4CNDPDBP-NDPA-2 | 64.1                          | 61.5             | 34.3           | 159.9 |
|         | 4CNDPDBP-tBUTPA | 60.0                          | 58.4             | 31.0           | 149.4 |
|         | 4CNDPDBP-DPAC   | 98.1                          | 77.7             | 42.5           | 218.3 |
| Solid   | 4CNDPDBP-TPA    | 58.1                          | 56.9             | 26.8           | 141.8 |
|         | 4CNDPDBP-NDPA-1 | 62.9                          | 102.3            | 30.3           | 195.5 |
|         | 4CNDPDBP-DBPPA  | 154.5                         | 71.0             | 38.8           | 264.3 |
|         | 4CNDPDBP-NDPA-2 | 72.8                          | 74.1             | 43.9           | 190.8 |
|         | 4CNDPDBP-tBUTPA | 332.9                         | 77.0             | 43.8           | 453.7 |
|         | 4CNDPDBP-DPAC   | 80.5                          | 88.0             | 47.5           | 216.0 |

Table S14. Transition dipole moment vector contributions from fragment 1, fragment 2 and fragment 3 of 4CNDPDBP-TPA and the designed molecules in toluene.

| Transition dipole moment |          |         |          |         |               |
|--------------------------|----------|---------|----------|---------|---------------|
|                          | Fragment | X       | Y        | Z       | Total (Debye) |
| 4CNDPDBP-TPA             | 1        | -0.0096 | -0.0062  | 0.0007  | 0.0291        |
|                          | 2        | 1.0933  | -0.1100  | -0.0079 | 2.7929        |
|                          | 3        | 1.0493  | 0.9479   | -0.0023 | 3.5941        |
|                          | All      | 2.1330  | 0.8316   | -0.0095 | 5.8190        |
| 4CNDPDBP-NDPA-1          | 1        | -1.0102 | -0.9763  | 0.0240  | 3.5713        |
|                          | 2        | -1.2275 | 0.1198   | 0.0069  | 3.1348        |
|                          | 3        | 0.0148  | 0.0002   | -0.0003 | 0.0376        |
|                          | All      | -2.2229 | -0.8563  | 0.0306  | 6.0552        |
| 4CNDPDBP-DBPPA           | 1        | -0.0245 | -0.0148  | 0.0017  | 0.0729        |
|                          | 2        | 1.1650  | 0.1980   | -0.0136 | 3.0037        |
|                          | 3        | 0.8005  | -0.8263  | 0.0390  | 2.9258        |
|                          | All      | 1.9409  | -0.6431  | 0.0271  | 5.1974        |
| 4CNDPDBP-NDPA-2          | 1        | -0.0118 | -0.0334  | 0.0013  | 0.0901        |
|                          | 2        | -0.9497 | -0.0717  | -0.0029 | 2.4207        |
|                          | 3        | -0.8311 | 0.5784   | 0.0702  | 2.5798        |
|                          | All      | -1.7925 | 0.4733   | 0.0685  | 4.7154        |
| 4CNDPDBP-tBUTPA          | 1        | -0.0271 | -0.02334 | 0.0004  | 0.0909        |
|                          | 2        | 1.1465  | 0.1544   | -0.0125 | 2.9405        |
|                          | 3        | 0.7975  | -0.8671  | 0.0078  | 2.9944        |
|                          | All      | 1.9169  | -0.7360  | -0.0043 | 5.2190        |
| 4CNDPDBP-DPAC            | 1        | -0.0001 | -0.0002  | -0.0002 | 0.0008        |
|                          | 2        | -0.0532 | -0.0067  | 0.0005  | 0.1363        |
|                          | 3        | -0.0396 | 0.0465   | -0.0170 | 0.1611        |
|                          | All      | -0.0929 | 0.0396   | -0.0167 | 0.2602        |

Table S15. Transition dipole moment vector contributions from fragment 1, fragment 2 and fragment 3 of 4CNDPDBP-TPA and the designed molecules in solid phase.

| Transition dipole moment |          |         |         |         |               |
|--------------------------|----------|---------|---------|---------|---------------|
|                          | Fragment | X       | Y       | Z       | Total (Debye) |
| 4CNDPDBP-TPA             | 1        | 0.8633  | -0.7510 | 0.0088  | 2.9084        |
|                          | 2        | 0.7682  | 0.0579  | -0.0107 | 1.9583        |
|                          | 3        | -0.0815 | -0.0611 | -0.0012 | 0.2589        |
|                          | All      | 1.5499  | -0.7542 | -0.0032 | 4.3810        |
| 4CNDPDBP-NDPA-1          | 1        | -0.7351 | -0.6917 | 0.0247  | 2.5663        |
|                          | 2        | -0.7912 | 0.1141  | 0.0110  | 2.0320        |
|                          | 3        | 0.0545  | -0.0385 | -0.0056 | 0.1702        |

|                 |     |         |         |         |        |
|-----------------|-----|---------|---------|---------|--------|
|                 | All | -1.4718 | -0.6161 | 0.0301  | 4.0561 |
| 4CNDPDBP-DBPPA  | 1   | -0.5642 | -0.8220 | 0.0420  | 2.5363 |
|                 | 2   | -0.9076 | 0.0082  | 0.0169  | 2.3073 |
|                 | 3   | 0.0693  | -0.0640 | 0.0115  | 0.2415 |
|                 | All | -1.4025 | -0.8778 | 0.0704  | 4.2092 |
| 4CNDPDBP-NDPA-2 | 1   | 0.5451  | 0.3852  | -0.0267 | 1.6979 |
|                 | 2   | 0.5474  | -0.0670 | -0.0009 | 1.4017 |
|                 | 3   | 0.0030  | -0.0294 | 0.0050  | 0.0762 |
|                 | All | 1.0956  | 0.2888  | -0.0226 | 2.8804 |
| 4CNDPDBP-tBUTPA | 1   | -0.5632 | -0.8042 | 0.0453  | 2.4981 |
|                 | 2   | -0.8325 | 0.0179  | -0.0055 | 2.1165 |
|                 | 3   | 0.0652  | -0.0567 | 0.0049  | 0.2200 |
|                 | All | -1.3305 | -0.8430 | 0.0447  | 4.0050 |
| 4CNDPDBP-DPAC   | 1   | 0.0520  | -0.0555 | -0.0166 | 0.1979 |
|                 | 2   | 0.0604  | 0.0141  | -0.0007 | 0.1577 |
|                 | 3   | -0.0007 | -0.0006 | 0.0000  | 0.0023 |
|                 | All | 0.1117  | -0.0420 | -0.0174 | 0.3065 |

Table S16. Intermolecular interaction energy analyses for selected dimers extracted from the solid phase of 4CNDPDBP-TPA. (Unit: kJ mol<sup>-1</sup>).

|              |         | Electrostatic | Repulsion | Dispersion | Total         |
|--------------|---------|---------------|-----------|------------|---------------|
|              | Dimer-1 | -16.65        | 60.79     | -137.78    | -93.64 kJ/mol |
|              | Dimer-2 | -7.28         | 32.47     | -54.31     | -29.12 kJ/mol |
| 4CNDPDBP-TPA | Dimer-3 | -17.49        | 27.41     | -36.23     | -26.31 kJ/mol |
|              | Dimer-4 | -31.67        | 141.13    | -223.76    | -114.3 kJ/mol |
|              | Dimer-5 | -0.42         | 8.70      | -21.46     | -13.18 kJ/mol |

Table S17. Intermolecular interaction energy analyses for selected dimers extracted from the solid phase of 4CNDPDBP-NDPA-1. (Unit: kJ mol<sup>-1</sup>).

|                 |         | Electrostatic | Repulsion | Dispersion | Total          |
|-----------------|---------|---------------|-----------|------------|----------------|
|                 | Dimer-1 | -10.38        | 65.35     | -140.75    | -85.78 kJ/mol  |
|                 | Dimer-2 | -0.79         | 25.61     | -41.80     | -16.98 kJ/mol  |
| 4CNDPDBP-NDPA-1 | Dimer-3 | -3.51         | 12.47     | -17.24     | -8.28 kJ/mol   |
|                 | Dimer-4 | -31.42        | 122.72    | -195.69    | -104.39 kJ/mol |
|                 | Dimer-5 | -4.90         | 14.73     | -18.49     | -8.66 kJ/mol   |

Table S18. Intermolecular interaction energy analyses for selected dimers extracted from the solid phase of 4CNDPDBP-DBPPA. (Unit: kJ mol<sup>-1</sup>).

|                |         | Electrostatic | Repulsion | Dispersion | Total          |
|----------------|---------|---------------|-----------|------------|----------------|
| 4CNDPDBP-DBPPA | Dimer-1 | -10.37        | 35.96     | -56.79     | -31.20 kJ/mol  |
|                | Dimer-2 | -7.61         | 28.37     | -37.57     | -16.81 kJ/mol  |
|                | Dimer-3 | -38.66        | 133.13    | -222.21    | -127.74 kJ/mol |
|                | Dimer-4 | -3.18         | 10.21     | -14.81     | -7.78 kJ/mol   |
|                | Dimer-5 | -6.28         | 19.62     | -34.23     | -20.89 kJ/mol  |

Table S19. Intermolecular interaction energy analyses for selected dimers extracted from the solid phase of 4CNDPDBP-NDPA-2. (Unit: kJ mol<sup>-1</sup>).

|                 |         | Electrostatic | Repulsion | Dispersion | Total          |
|-----------------|---------|---------------|-----------|------------|----------------|
| 4CNDPDBP-NDPA-2 | Dimer-1 | -31.42        | 122.72    | -195.69    | -104.39 kJ/mol |
|                 | Dimer-2 | -3.51         | 12.47     | -17.24     | -8.28 kJ/mol   |
|                 | Dimer-3 | -4.85         | 14.73     | -18.49     | -8.61 kJ/mol   |
|                 | Dimer-4 | -10.38        | 65.35     | -140.75    | -85.78 kJ/mol  |
|                 | Dimer-5 | -0.79         | 25.61     | -41.80     | -16.98 kJ/mol  |

Table S20. Intermolecular interaction energy analyses for selected dimers extracted from the solid phase of 4CNDPDBP-tBUTPA. (Unit: kJ mol<sup>-1</sup>).

|                 |         | Electrostatic | Repulsion | Dispersion | Total          |
|-----------------|---------|---------------|-----------|------------|----------------|
| 4CNDPDBP-tBUTPA | Dimer-1 | -46.32        | 150.12    | -227.86    | -124.06 kJ/mol |
|                 | Dimer-2 | -4.06         | 0.17      | -2.01      | -5.90 kJ/mol   |
|                 | Dimer-3 | -57.45        | 170.71    | -255.22    | -141.96 kJ/mol |
|                 | Dimer-4 | -16.90        | 57.95     | -76.57     | -35.52 kJ/mol  |
|                 | Dimer-5 | -11.88        | 43.64     | -62.01     | -30.25 kJ/mol  |

Table S21. Intermolecular interaction energy analyses for selected dimers extracted from the solid phase of 4CNDPDBP-DPAC. (Unit: kJ mol<sup>-1</sup>).

|               |         | Electrostatic | Repulsion | Dispersion | Total         |
|---------------|---------|---------------|-----------|------------|---------------|
| 4CNDPDBP-DPAC | Dimer-1 | -15.10        | 63.60     | -111.04    | -62.54 kJ/mol |
|               | Dimer-2 | -6.65         | 22.55     | -35.94     | -20.04 kJ/mol |

---

|         |        |       |         |               |
|---------|--------|-------|---------|---------------|
| Dimer-3 | -21.97 | 71.42 | -117.53 | -68.08 kJ/mol |
| Dimer-4 | -5.82  | 19.83 | -32.68  | -18.67 kJ/mol |
| Dimer-5 | -5.86  | 38.95 | -64.06  | -30.97 kJ/mol |

---
